# Supplementary material for: A novel candidate HIV vaccine vector based on the replication deficient Capripoxvirus, Lumpy skin disease virus (LSDV)
Source: Springer Nature journal article supplement (doi:10.1186/1743-422x-8-265), 2011-05-30

**(a) IFN- $\gamma$  ELISPOT responses**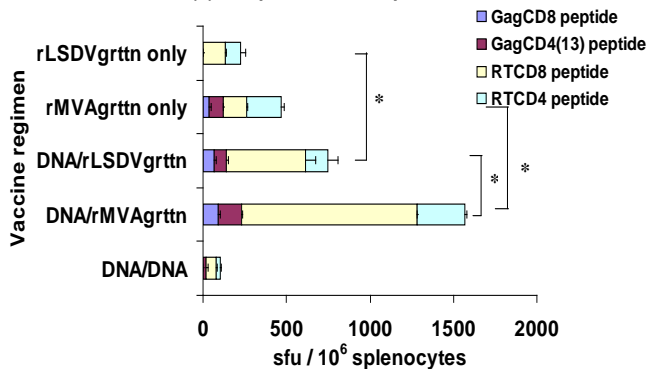**(c) IL-2 ELISPOT responses**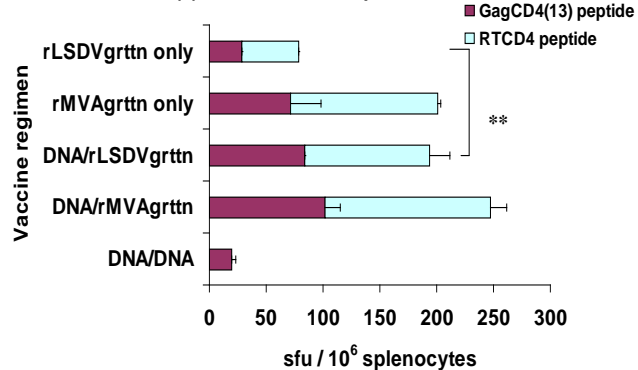**(b) Cumulative IFN- $\gamma$  released during splenocyte culture**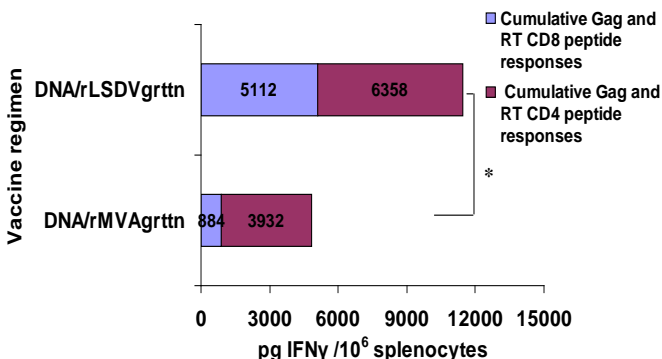

Supplement: 12985_2011_1349_MOESM3_ESM.pdf [file 12985_2011_1349_MOESM3_ESM.pdf]
