# Supplementary figures and images for: A novel candidate HIV vaccine vector based on the replication deficient Capripoxvirus, Lumpy skin disease virus (LSDV)
Source: Springer Nature journal article supplement (doi:10.1186/1743-422x-8-265), 2011-05-30

(a)

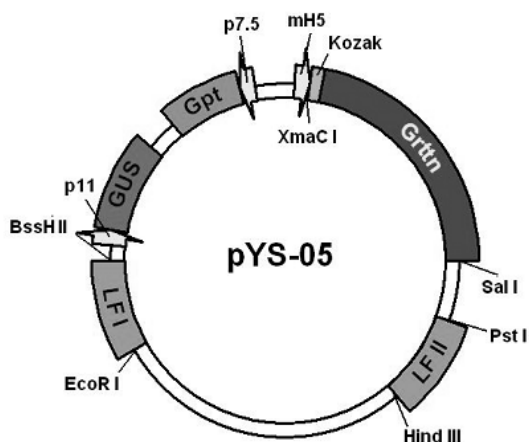

(b)

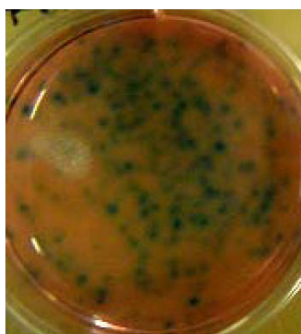

(c)

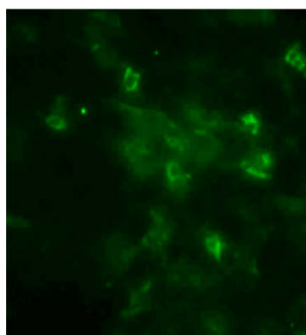

(d)

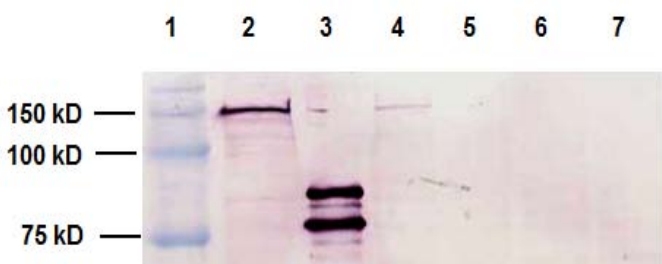

Supplement: 12985_2011_1349_MOESM1_ESM.pdf [file 12985_2011_1349_MOESM1_ESM.pdf]

(a)

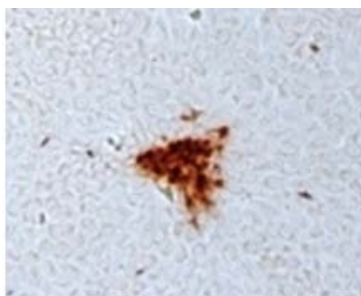

(b)

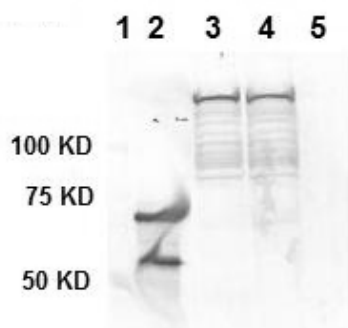

(c)

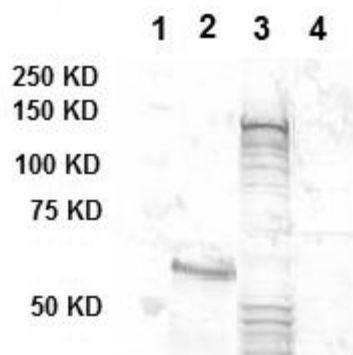

(d)

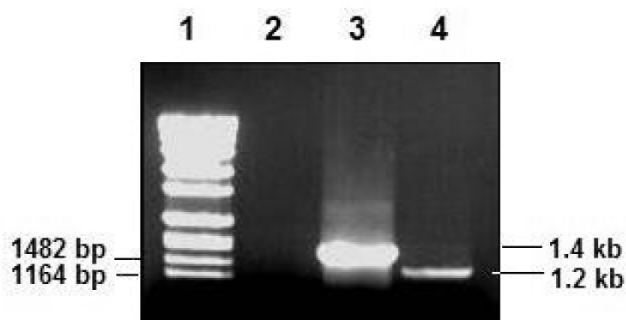

Supplement: 12985_2011_1349_MOESM2_ESM.pdf [file 12985_2011_1349_MOESM2_ESM.pdf]
